# Supplementary material for: Structural insight into inhibition of REV7 protein interaction revealed by docking, molecular dynamics and MM/PBSA studies
Source: Royal Society of Chemistry journal article supplement (doi:10.1039/c7ra03716c), 2017-01-01
Supplement: c7ra03716c1.pdf [file c7ra03716c1.pdf]

---

## Supplementary Information

### Structural Insight into Inhibition of REV7 Protein Interaction Revealed by Docking, Molecular Dynamics and MM/PBSA Studies

Xiaodong Ren<sup>1</sup>, Rui Zeng<sup>2\*</sup>, Changwei Wang<sup>3</sup>, Mingming Zhang<sup>4</sup>, Chengyuan Liang<sup>5</sup>, Zhonghai Tang<sup>6</sup>, Jinfeng Ren<sup>7</sup>

<sup>1</sup>Department of Pharmacy, Guizhou Provincial People's Hospital, Guiyang 550002, P.R. China.

<sup>2</sup>College of Pharmacy, Southwest University for Nationalities, Chengdu 610041, P.R. China.

<sup>3</sup>Guangzhou Institute of Biomedicine and Health (GIBH), Chinese Academy of Sciences (CAS), Guangzhou, Guangdong 510530, P.R. China

<sup>4</sup>School of Pharmacy, Fudan University, Shanghai 201203, P.R. China.

<sup>5</sup>Department of Pharmacy, Shaanxi University of Science & Technology, Xi'an 710021, P.R. China.

<sup>6</sup>College of Bioscience and Biotechnology, Hunan Agriculture University, Changsha 410128, Hunan, P.R. China.

<sup>7</sup>Department of Medicine, Stony Brook University, Stony Brook, New York. 11794, USA

\* Correspondence: rzeng@swun.edu.cn

**Table S1:** The GAFF atom type, atom name, charge and mass for all the atoms of compound **7** generated using ACPYPE.

| Atom number | Atom type | Atom name | Charge    | Mass  |
|-------------|-----------|-----------|-----------|-------|
| 1           | c         | C1        | 0.735099  | 12.01 |
| 2           | n         | N1        | -0.3963   | 14.01 |
| 3           | cc        | C2        | 0.4898    | 12.01 |
| 4           | nd        | N2        | -0.594101 | 14.01 |
| 5           | cd        | C3        | 0.1363    | 12.01 |
| 6           | cc        | C4        | -0.2106   | 12.01 |
| 7           | ss        | S1        | 0.1372    | 32.06 |
| 8           | cd        | C5        | -0.2111   | 12.01 |
| 9           | cc        | C6        | -0.0605   | 12.01 |
| 10          | o         | O1        | -0.595501 | 16    |
| 11          | c3        | C11       | 0.081     | 12.01 |
| 12          | c3        | C12       | -0.0807   | 12.01 |
| 13          | c3        | C13       | -0.1019   | 12.01 |
| 14          | c3        | C14       | 0.085     | 12.01 |
| 15          | n         | N3        | -0.4648   | 14.01 |
| 16          | c3        | C15       | 0.085     | 12.01 |
| 17          | c         | C17       | 0.654101  | 12.01 |
| 18          | c3        | C16       | -0.1019   | 12.01 |
| 19          | o         | O3        | -0.603101 | 16    |
| 20          | c3        | C18       | -0.1701   | 12.01 |
| 21          | cc        | C7        | 0.2932    | 12.01 |
| 22          | os        | O2        | -0.3128   | 16    |
| 23          | cc        | C8        | 0.27      | 12.01 |
| 24          | cd        | C9        | -0.2783   | 12.01 |
| 25          | c3        | C19       | -0.1364   | 12.01 |
| 26          | cd        | C10       | -0.2323   | 12.01 |
| 27          | h5        | H2        | 0.0538    | 1.008 |
| 28          | h4        | H5        | 0.181     | 1.008 |
| 29          | h1        | H112      | 0.0722    | 1.008 |
| 30          | h1        | H113      | 0.0722    | 1.008 |
| 31          | hc        | H12       | 0.0497    | 1.008 |
| 32          | hc        | H132      | 0.05695   | 1.008 |
| 33          | hc        | H133      | 0.05695   | 1.008 |
| 34          | h1        | H142      | 0.0587    | 1.008 |
| 35          | h1        | H143      | 0.0587    | 1.008 |
| 36          | h1        | H152      | 0.0587    | 1.008 |
| 37          | h1        | H153      | 0.0587    | 1.008 |
| 38          | hc        | H162      | 0.05695   | 1.008 |
| 39          | hc        | H163      | 0.05695   | 1.008 |
| 40          | hc        | H181      | 0.065367  | 1.008 |
| 41          | hc        | H182      | 0.065367  | 1.008 |

|    |    |      |          |       |
|----|----|------|----------|-------|
| 42 | hc | H183 | 0.065367 | 1.008 |
| 43 | ha | H9   | 0.159    | 1.008 |
| 44 | hc | H191 | 0.060367 | 1.008 |
| 45 | hc | H192 | 0.060367 | 1.008 |
| 46 | hc | H193 | 0.060367 | 1.008 |
| 47 | ha | H10  | 0.156    | 1.008 |

**Table S2:** The GAFF atom type, atom name, charge and mass for all the atoms of compound **13** generated using ACPYPE.

| Atom number | Atom type | Atom name | Charge    | Mass  |
|-------------|-----------|-----------|-----------|-------|
| 1           | c         | C1        | 0.729101  | 12.01 |
| 2           | n         | N1        | -0.3993   | 14.01 |
| 3           | cc        | C2        | 0.4908    | 12.01 |
| 4           | nd        | N2        | -0.584101 | 14.01 |
| 5           | cd        | C3        | 0.1373    | 12.01 |
| 6           | cc        | C4        | -0.2126   | 12.01 |
| 7           | ss        | S1        | 0.1512    | 32.06 |
| 8           | cd        | C5        | -0.2101   | 12.01 |
| 9           | cc        | C6        | -0.0645   | 12.01 |
| 10          | o         | O1        | -0.610501 | 16    |
| 11          | c3        | C12       | 0.095     | 12.01 |
| 12          | cy        | C13       | -0.1307   | 12.01 |
| 13          | cy        | C14       | 0.0635    | 12.01 |
| 14          | n         | N3        | -0.4438   | 14.01 |
| 15          | cy        | C15       | 0.0635    | 12.01 |
| 16          | c         | C16       | 0.641101  | 12.01 |
| 17          | c3        | C17       | -0.1721   | 12.01 |
| 18          | o         | O3        | -0.592101 | 16    |
| 19          | cc        | C7        | 0.2962    | 12.01 |
| 20          | os        | O2        | -0.3168   | 16    |
| 21          | cc        | C8        | 0.267     | 12.01 |
| 22          | cd        | C9        | -0.2763   | 12.01 |
| 23          | c3        | C11       | -0.1354   | 12.01 |
| 24          | cd        | C10       | -0.2333   | 12.01 |
| 25          | h5        | H2        | 0.0578    | 1.008 |
| 26          | h4        | H5        | 0.182     | 1.008 |
| 27          | h1        | H122      | 0.0732    | 1.008 |
| 28          | h1        | H123      | 0.0732    | 1.008 |
| 29          | hc        | H13       | 0.0787    | 1.008 |
| 30          | h1        | H142      | 0.0697    | 1.008 |
| 31          | h1        | H143      | 0.0697    | 1.008 |
| 32          | h1        | H152      | 0.0697    | 1.008 |
| 33          | h1        | H153      | 0.0697    | 1.008 |
| 34          | hc        | H171      | 0.068033  | 1.008 |

|    |    |      |          |       |
|----|----|------|----------|-------|
| 35 | hc | H172 | 0.068033 | 1.008 |
| 36 | hc | H173 | 0.068033 | 1.008 |
| 37 | ha | H9   | 0.16     | 1.008 |
| 38 | hc | H111 | 0.060367 | 1.008 |
| 39 | hc | H112 | 0.060367 | 1.008 |
| 40 | hc | H113 | 0.060367 | 1.008 |
| 41 | ha | H10  | 0.158    | 1.008 |

**Table S3:** The GAFF atom type, atom name, charge and mass for all the atoms of compound **14R** generated using ACPYPE.

| Atom number | Atom type | Atom name | Charge    | Mass  |
|-------------|-----------|-----------|-----------|-------|
| 1           | c         | C1        | 0.732101  | 12.01 |
| 2           | n         | N1        | -0.4003   | 14.01 |
| 3           | cc        | C2        | 0.4888    | 12.01 |
| 4           | nd        | N2        | -0.593101 | 14.01 |
| 5           | cd        | C3        | 0.1343    | 12.01 |
| 6           | cc        | C4        | -0.2106   | 12.01 |
| 7           | ss        | S1        | 0.1412    | 32.06 |
| 8           | cd        | C5        | -0.2101   | 12.01 |
| 9           | cc        | C6        | -0.0615   | 12.01 |
| 10          | o         | O1        | -0.597501 | 16    |
| 11          | c3        | C12       | 0.095     | 12.01 |
| 12          | c3        | C13       | -0.0977   | 12.01 |
| 13          | c3        | C14       | 0.09      | 12.01 |
| 14          | n         | N3        | -0.4728   | 14.01 |
| 15          | c         | C15       | 0.656101  | 12.01 |
| 16          | c3        | C18       | 0.085     | 12.01 |
| 17          | c3        | C16       | -0.1701   | 12.01 |
| 18          | o         | O3        | -0.601101 | 16    |
| 19          | c3        | C17       | -0.0894   | 12.01 |
| 20          | cc        | C7        | 0.2932    | 12.01 |
| 21          | os        | O2        | -0.3148   | 16    |
| 22          | cc        | C8        | 0.27      | 12.01 |
| 23          | cd        | C9        | -0.2773   | 12.01 |
| 24          | c3        | C11       | -0.1364   | 12.01 |
| 25          | cd        | C10       | -0.2313   | 12.01 |
| 26          | h5        | H2        | 0.0568    | 1.008 |
| 27          | h4        | H5        | 0.182     | 1.008 |
| 28          | h1        | H122      | 0.0702    | 1.008 |
| 29          | h1        | H123      | 0.0702    | 1.008 |
| 30          | hc        | H13       | 0.0877    | 1.008 |
| 31          | h1        | H142      | 0.0417    | 1.008 |

|    |    |      |          |       |
|----|----|------|----------|-------|
| 32 | h1 | H143 | 0.0417   | 1.008 |
| 33 | h1 | H182 | 0.0587   | 1.008 |
| 34 | h1 | H183 | 0.0587   | 1.008 |
| 35 | hc | H161 | 0.066033 | 1.008 |
| 36 | hc | H162 | 0.066033 | 1.008 |
| 37 | hc | H163 | 0.066033 | 1.008 |
| 38 | hc | H172 | 0.0572   | 1.008 |
| 39 | hc | H173 | 0.0572   | 1.008 |
| 40 | ha | H9   | 0.16     | 1.008 |
| 41 | hc | H111 | 0.060367 | 1.008 |
| 42 | hc | H112 | 0.060367 | 1.008 |
| 43 | hc | H113 | 0.060367 | 1.008 |
| 44 | ha | H10  | 0.157    | 1.008 |

**Table S4:** The GAFF atom type, atom name, charge and mass for all the atoms of compound **14S** generated using ACPYPE.

| Atom number | Atom type | Atom name | Charge    | Mass  |
|-------------|-----------|-----------|-----------|-------|
| 1           | o         | O         | -0.600501 | 16    |
| 2           | cc        | C         | -0.0605   | 12.01 |
| 3           | cd        | C1        | -0.2101   | 12.01 |
| 4           | ss        | S         | 0.1452    | 32.06 |
| 5           | c         | C2        | 0.7321    | 12.01 |
| 6           | cc        | C3        | -0.2086   | 12.01 |
| 7           | cd        | C4        | 0.1333    | 12.01 |
| 8           | nd        | N         | -0.591101 | 14.01 |
| 9           | cc        | C5        | 0.4868    | 12.01 |
| 10          | n         | N1        | -0.3953   | 14.01 |
| 11          | c3        | C6        | 0.091     | 12.01 |
| 12          | c3        | C7        | -0.0907   | 12.01 |
| 13          | c3        | C8        | -0.0984   | 12.01 |
| 14          | c3        | C9        | 0.09      | 12.01 |
| 15          | n         | N2        | -0.4738   | 14.01 |
| 16          | c         | C10       | 0.658101  | 12.01 |
| 17          | c3        | C11       | 0.095     | 12.01 |
| 18          | c3        | C12       | -0.1701   | 12.01 |
| 19          | o         | O1        | -0.601101 | 16    |
| 20          | cc        | C13       | 0.2932    | 12.01 |
| 21          | cd        | C14       | -0.2313   | 12.01 |
| 22          | cd        | C15       | -0.2773   | 12.01 |
| 23          | cc        | C16       | 0.269     | 12.01 |
| 24          | c3        | C17       | -0.1354   | 12.01 |
| 25          | os        | O2        | -0.3138   | 16    |
| 26          | h4        | HC        | 0.182     | 1.008 |

|    |    |      |          |       |
|----|----|------|----------|-------|
| 27 | h5 | HC1  | 0.0518   | 1.008 |
| 28 | h1 | HC2  | 0.0707   | 1.008 |
| 29 | h1 | HC3  | 0.0707   | 1.008 |
| 30 | hc | HC4  | 0.0657   | 1.008 |
| 31 | hc | HC5  | 0.0697   | 1.008 |
| 32 | hc | HC6  | 0.0697   | 1.008 |
| 33 | h1 | HC7  | 0.0592   | 1.008 |
| 34 | h1 | HC8  | 0.0592   | 1.008 |
| 35 | h1 | HC9  | 0.0367   | 1.008 |
| 36 | h1 | HC10 | 0.0367   | 1.008 |
| 37 | hc | HC11 | 0.0647   | 1.008 |
| 38 | hc | HC12 | 0.0647   | 1.008 |
| 39 | hc | HC13 | 0.0647   | 1.008 |
| 40 | ha | HC14 | 0.157    | 1.008 |
| 41 | ha | HC15 | 0.16     | 1.008 |
| 42 | hc | HC16 | 0.060367 | 1.008 |
| 43 | hc | HC17 | 0.060367 | 1.008 |
| 44 | hc | HC18 | 0.060367 | 1.008 |

**Table S5:** The GAFF atom type, atom name, charge and mass for all the atoms of compound **15R** generated using ACPYPE.

| Atom number | Atom type | Atom name | Charge    | Mass  |
|-------------|-----------|-----------|-----------|-------|
| 1           | c         | C1        | 0.731102  | 12.01 |
| 2           | n         | N1        | -0.4003   | 14.01 |
| 3           | cc        | C2        | 0.4858    | 12.01 |
| 4           | nd        | N2        | -0.593101 | 14.01 |
| 5           | cd        | C3        | 0.1323    | 12.01 |
| 6           | cc        | C4        | -0.2096   | 12.01 |
| 7           | ss        | S1        | 0.1412    | 32.06 |
| 8           | cd        | C5        | -0.2101   | 12.01 |
| 9           | cc        | C6        | -0.0605   | 12.01 |
| 10          | o         | O1        | -0.593501 | 16    |
| 11          | c3        | C12       | 0.089     | 12.01 |
| 12          | c3        | C13       | -0.1127   | 12.01 |
| 13          | c3        | C14       | 0.087     | 12.01 |
| 14          | n         | N3        | -0.4588   | 14.01 |
| 15          | c         | C15       | 0.653101  | 12.01 |
| 16          | c3        | C17       | 0.076     | 12.01 |
| 17          | c3        | C16       | -0.1711   | 12.01 |
| 18          | o         | O3        | -0.602101 | 16    |
| 19          | c3        | C18       | -0.1034   | 12.01 |
| 20          | c3        | C19       | -0.0744   | 12.01 |

|    |    |      |          |       |
|----|----|------|----------|-------|
| 21 | cc | C7   | 0.2922   | 12.01 |
| 22 | os | O2   | -0.3138  | 16    |
| 23 | cc | C8   | 0.27     | 12.01 |
| 24 | cd | C9   | -0.2773  | 12.01 |
| 25 | c3 | C11  | -0.1364  | 12.01 |
| 26 | cd | C10  | -0.2313  | 12.01 |
| 27 | h5 | H2   | 0.0548   | 1.008 |
| 28 | h4 | H5   | 0.182    | 1.008 |
| 29 | h1 | H122 | 0.0717   | 1.008 |
| 30 | h1 | H123 | 0.0717   | 1.008 |
| 31 | hc | H13  | 0.0797   | 1.008 |
| 32 | h1 | H142 | 0.0477   | 1.008 |
| 33 | h1 | H143 | 0.0477   | 1.008 |
| 34 | h1 | H172 | 0.0667   | 1.008 |
| 35 | h1 | H173 | 0.0667   | 1.008 |
| 36 | hc | H161 | 0.067033 | 1.008 |
| 37 | hc | H162 | 0.067033 | 1.008 |
| 38 | hc | H163 | 0.067033 | 1.008 |
| 39 | hc | H182 | 0.0547   | 1.008 |
| 40 | hc | H183 | 0.0547   | 1.008 |
| 41 | hc | H192 | 0.0462   | 1.008 |
| 42 | hc | H193 | 0.0462   | 1.008 |
| 43 | ha | H9   | 0.16     | 1.008 |
| 44 | hc | H111 | 0.0607   | 1.008 |
| 45 | hc | H112 | 0.0607   | 1.008 |
| 46 | hc | H113 | 0.0607   | 1.008 |
| 47 | ha | H10  | 0.157    | 1.008 |

**Table S6:** The GAFF atom type, atom name, charge and mass for all the atoms of compound **15S** generated using ACPYPE.

| Atom number | Atom type | Atom name | Charge    | Mass  |
|-------------|-----------|-----------|-----------|-------|
| 1           | nc        | N         | -0.594101 | 14.01 |
| 2           | cd        | C         | 0.4908    | 12.01 |
| 3           | n         | N1        | -0.3963   | 14.01 |
| 4           | cc        | C1        | 0.1383    | 12.01 |
| 5           | cd        | C2        | -0.2116   | 12.01 |
| 6           | c         | C3        | 0.732103  | 12.01 |
| 7           | ss        | S         | 0.1362    | 32.06 |
| 8           | cc        | C4        | -0.2091   | 12.01 |
| 9           | cd        | C5        | -0.0635   | 12.01 |
| 10          | o         | O         | -0.600501 | 16    |
| 11          | c3        | C6        | 0.09      | 12.01 |
| 12          | c3        | C7        | -0.1077   | 12.01 |

---

|    |    |      |           |       |
|----|----|------|-----------|-------|
| 13 | c3 | C8   | 0.076     | 12.01 |
| 14 | n  | N2   | -0.4568   | 14.01 |
| 15 | c  | C9   | 0.652101  | 12.01 |
| 16 | c3 | C10  | 0.083     | 12.01 |
| 17 | c3 | C11  | -0.1691   | 12.01 |
| 18 | o  | O1   | -0.609101 | 16    |
| 19 | c3 | C12  | -0.1034   | 12.01 |
| 20 | c3 | C13  | -0.0774   | 12.01 |
| 21 | cd | C14  | 0.2962    | 12.01 |
| 22 | cc | C15  | -0.2343   | 12.01 |
| 23 | cc | C16  | -0.2773   | 12.01 |
| 24 | cd | C17  | 0.268     | 12.01 |
| 25 | os | O2   | -0.3148   | 16    |
| 26 | c3 | C18  | -0.1354   | 12.01 |
| 27 | h5 | HC   | 0.0598    | 1.008 |
| 28 | h4 | HC1  | 0.181     | 1.008 |
| 29 | h1 | HC2  | 0.0727    | 1.008 |
| 30 | h1 | HC3  | 0.0727    | 1.008 |
| 31 | hc | HC4  | 0.0677    | 1.008 |
| 32 | h1 | HC5  | 0.0642    | 1.008 |
| 33 | h1 | HC6  | 0.0642    | 1.008 |
| 34 | h1 | HC7  | 0.0522    | 1.008 |
| 35 | h1 | HC8  | 0.0522    | 1.008 |
| 36 | hc | HC9  | 0.066033  | 1.008 |
| 37 | hc | HC10 | 0.066033  | 1.008 |
| 38 | hc | HC11 | 0.066033  | 1.008 |
| 39 | hc | HC12 | 0.0502    | 1.008 |
| 40 | hc | HC13 | 0.0502    | 1.008 |
| 41 | hc | HC14 | 0.0582    | 1.008 |
| 42 | hc | HC15 | 0.0582    | 1.008 |
| 43 | ha | HC16 | 0.157     | 1.008 |
| 44 | ha | HC17 | 0.159     | 1.008 |
| 45 | hc | HC18 | 0.060033  | 1.008 |
| 46 | hc | HC19 | 0.060033  | 1.008 |
| 47 | hc | HC20 | 0.060033  | 1.008 |

---
